# Supplementary material for: Utilization of Preventive Medical Check-Up and Associated Factors Among Public Hospital Workers in Addis Ababa, Ethiopia
Source: Research Square preprint supplement (doi:10.21203/rs.3.rs-4167974/v1), 2024-04-03
Supplement: Supplementary file 1 [file b404202fbc9349464fafabfd.docx]

# LISTS OF TABLES

[Table 1:- Socio-demographic characteristic of Public Hospital Workers in Addis Ababa, Ethiopia 2019](#_Toc43463860)

[Table 2:- Health Care Access-related Factors of Study Participants with utilization of preventive medical checkup and public hospitals workers in Addis Ababa city administration, Binary logistic regression analysis, 2019.](#_Toc43463861)

[Table 3: -Factors associated with utilization of preventive medical checkup and public hospitals workers in Addis Ababa city administration, logistic regression analysis, 2019.](#_Toc43463862)
